# Supplementary material for: Green synthesis of bacterial mediated anti-proliferative gold nanoparticles: inducing mitotic arrest (G2/M phase) and apoptosis (intrinsic pathway)
Source: Royal Society of Chemistry journal article supplement (doi:10.1039/c5nr04577k), 2015-01-01

**Green synthesis of bacterial mediated anti-proliferative gold nanoparticles: Inducing mitotic arrest (G2/M phase) and apoptosis (Intrinsic pathway)**

C. Ganesh Kumar <sup>a,b,\*</sup>, Y. Poornachandra <sup>a,b</sup> and Cheemalamarri Chandrasekhar<sup>a</sup>

<sup>a</sup> Medicinal Chemistry and Pharmacology Division, CSIR-Indian Institute of Chemical Technology, Uppal Road, Hyderabad 500007, India

<sup>b</sup>Academy of Scientific and Innovative Research, CSIR-Indian Institute of Chemical Technology, Uppal Road, Hyderabad 500007, India

\*Corresponding author. Tel: +91-40-27193105; Fax: +91-40-27193189;

Email address: [cgkumar.iict@gov.in](mailto:cgkumar.iict@gov.in); [cgkumar5@gmail.com](mailto:cgkumar5@gmail.com)

Supplementary Figure S1. FT-IR spectra of (A) cell free supernatant of *Streptomyces clavuligerus* and (B) b-AuNP.

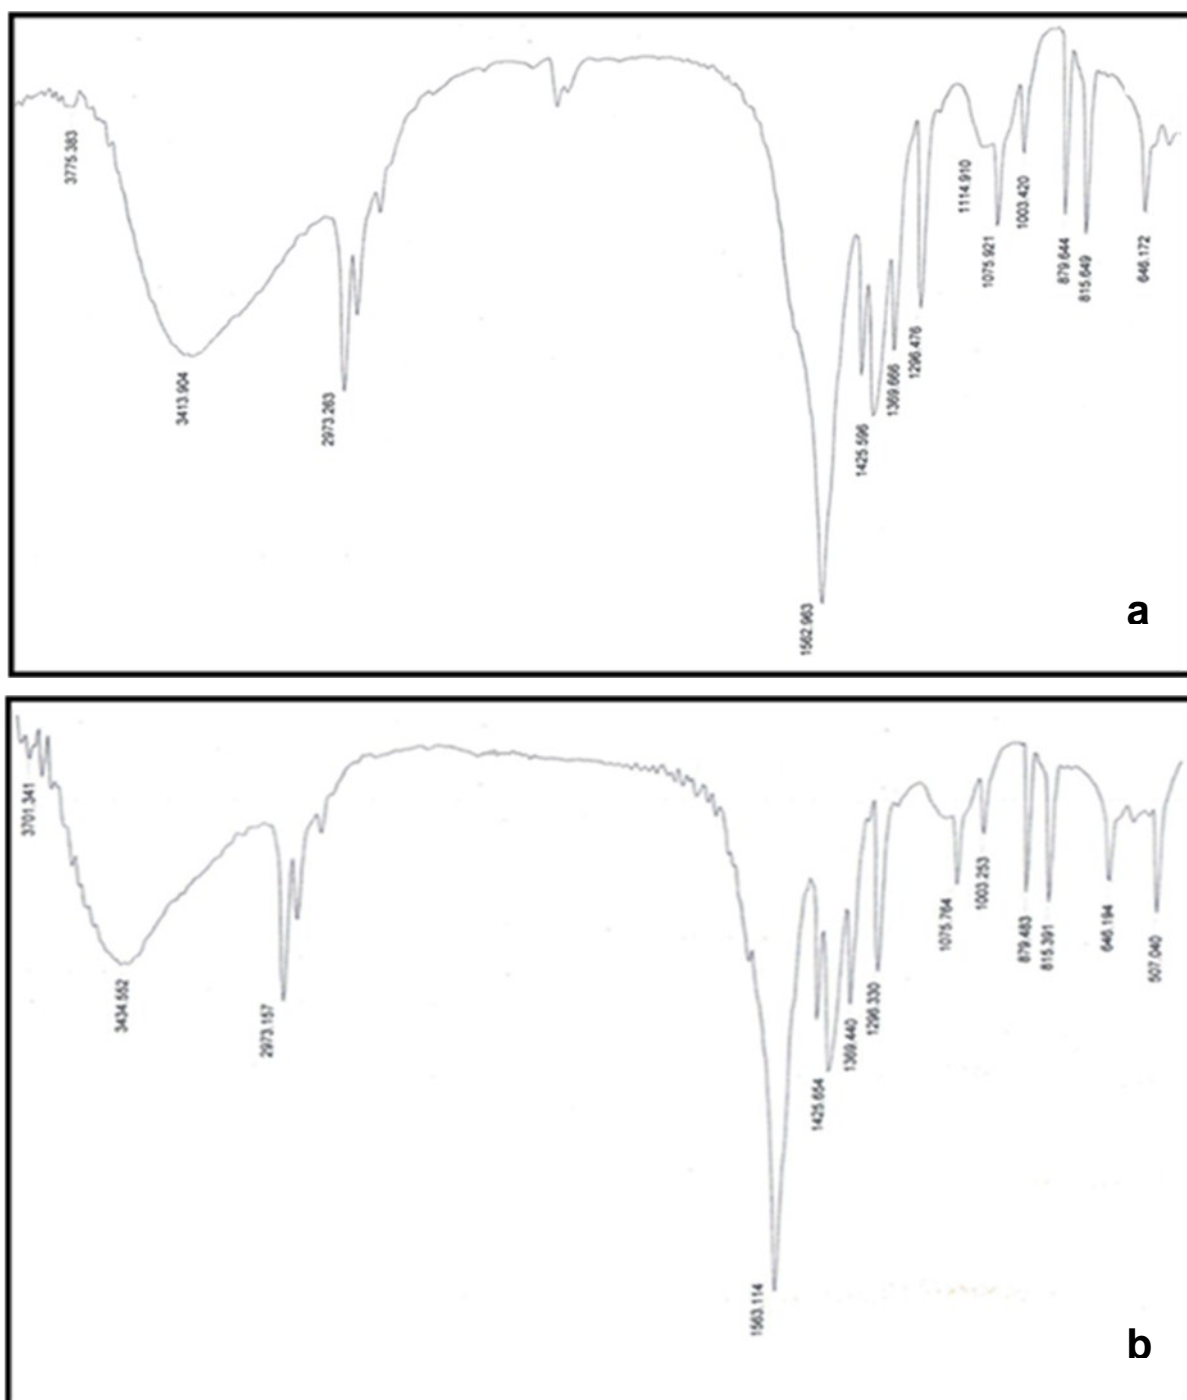

Supplementary Figure S2. SDS-PAGE analysis of the proteins present in the cell free supernatant of *Streptomyces clavuligerus* (SCS) and b-Au NPs [Lane 1: Protein marker, Lane 2: SCS, Lane 3: unboiled b-Au NPs and Lane 4: boiled b-Au NPs].

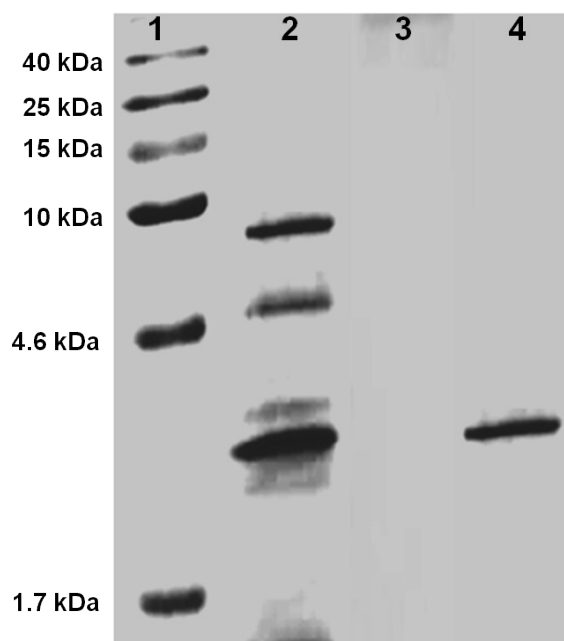

Supplementary Figure S3. MALDI-TOF mass spectra of the peptide present on the surface of gold nanoparticles and amino acid sequence of the peptide

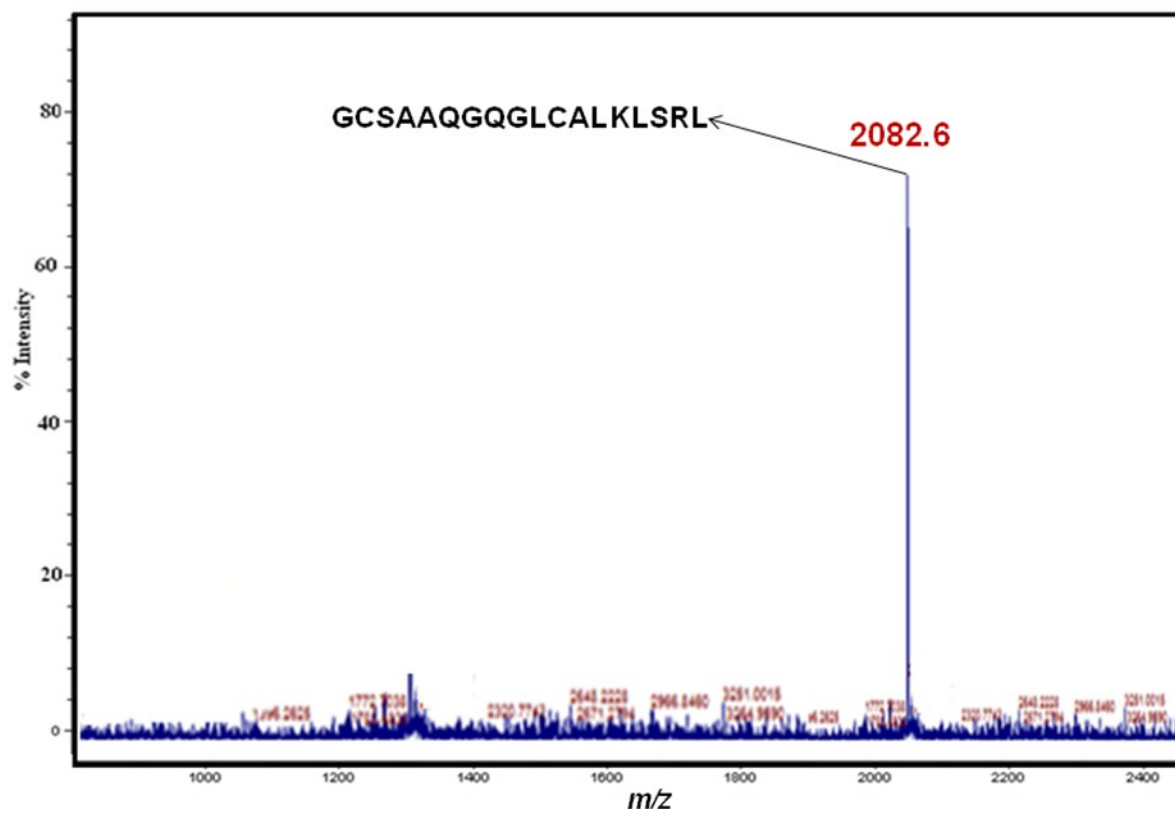

Supplementary Figure S4. *In vitro* stability of b-AuNP in different biological solutions

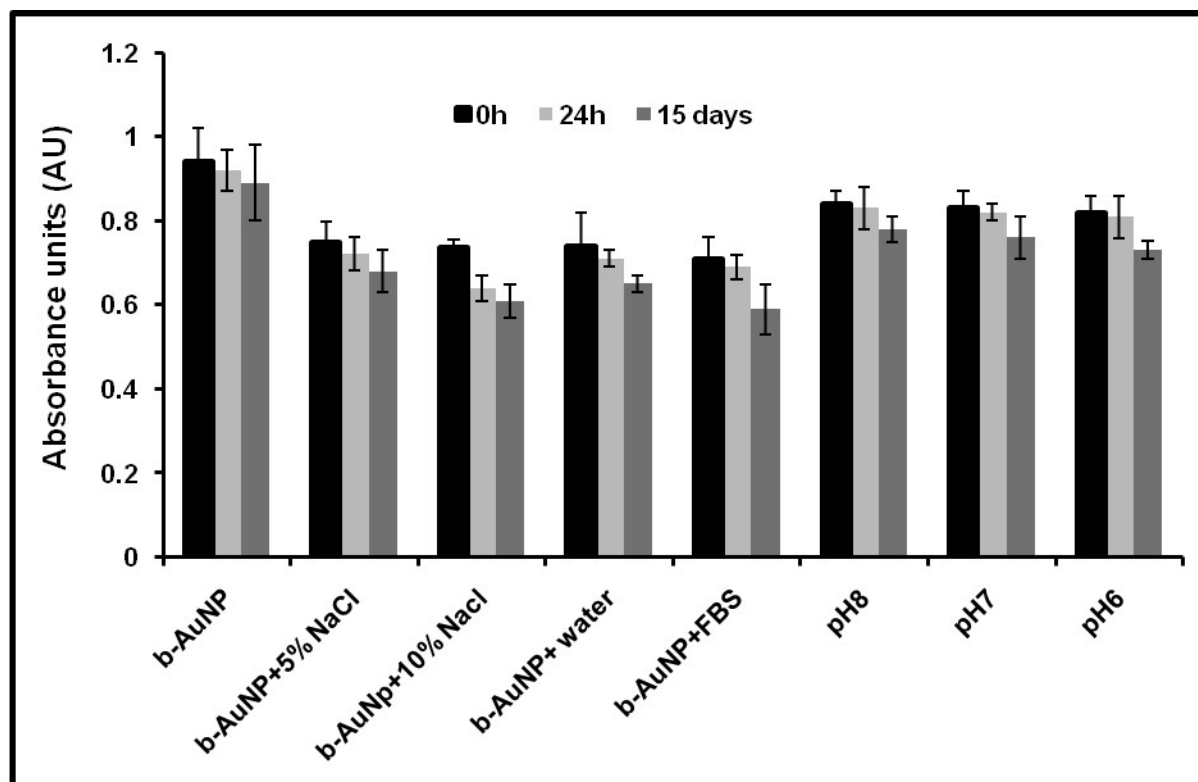

Supplement: c5nr04577k1.pdf [file c5nr04577k1.pdf]
